# Supplementary material for: genipe: an automated genome-wide imputation pipeline with automatic reporting and statistical tools
Source: PubMed Central journal article supplement — Bioinformatics. 2016 Aug 6;32(23):3661–3. doi: 10.1093/bioinformatics/btw487 (PMC5181529; doi:10.1093/bioinformatics/btw487), 2016-08-06
Supplement: supp_btw487_supplementary_material.pdf [file supp_btw487_supplementary_material.pdf]

# *genipe*: An automated genome-wide imputation pipeline with automatic reporting and statistical tools

## Supplementary Material

Lemieux Perreault, L.-P.    Legault, M.-A.    Asselin, G.    Dubé, M.-P.

**Table S1:** Imputation steps performed by *genipe*. The majority of steps are parallelized per chromosome or per genomic segments.

|    | <b>Step</b>                   | <b>Program</b> | <b>Parallel</b>    |
|----|-------------------------------|----------------|--------------------|
| 1  | Initial marker filtering      | PLINK          | No                 |
| 2  | Missing rate                  | PLINK          | No                 |
| 3  | Split by chromosome           | PLINK          | Yes (chromosome)   |
| 4  | Check strand                  | SHAPEIT        | Yes (chromosome)   |
| 5  | Flip                          | PLINK          | Yes (chromosome)   |
| 6  | Final check strand            | SHAPEIT        | Yes (chromosome)   |
| 7  | Final exclusion               | PLINK          | Yes (chromosome)   |
| 8  | Phasing                       | SHAPEIT        | Yes (chromosome)   |
| 9  | Imputation                    | IMPUTE2        | Yes (5Mb segments) |
| 10 | Cross validation statistics   | <i>genipe</i>  | No                 |
| 11 | Merge imputed segments        | <i>genipe</i>  | Yes (chromosome)   |
| 12 | Compression (optional)        | BGZIP          | Yes (chromosome)   |
| 13 | Imputation statistics and MAF | <i>genipe</i>  | No                 |

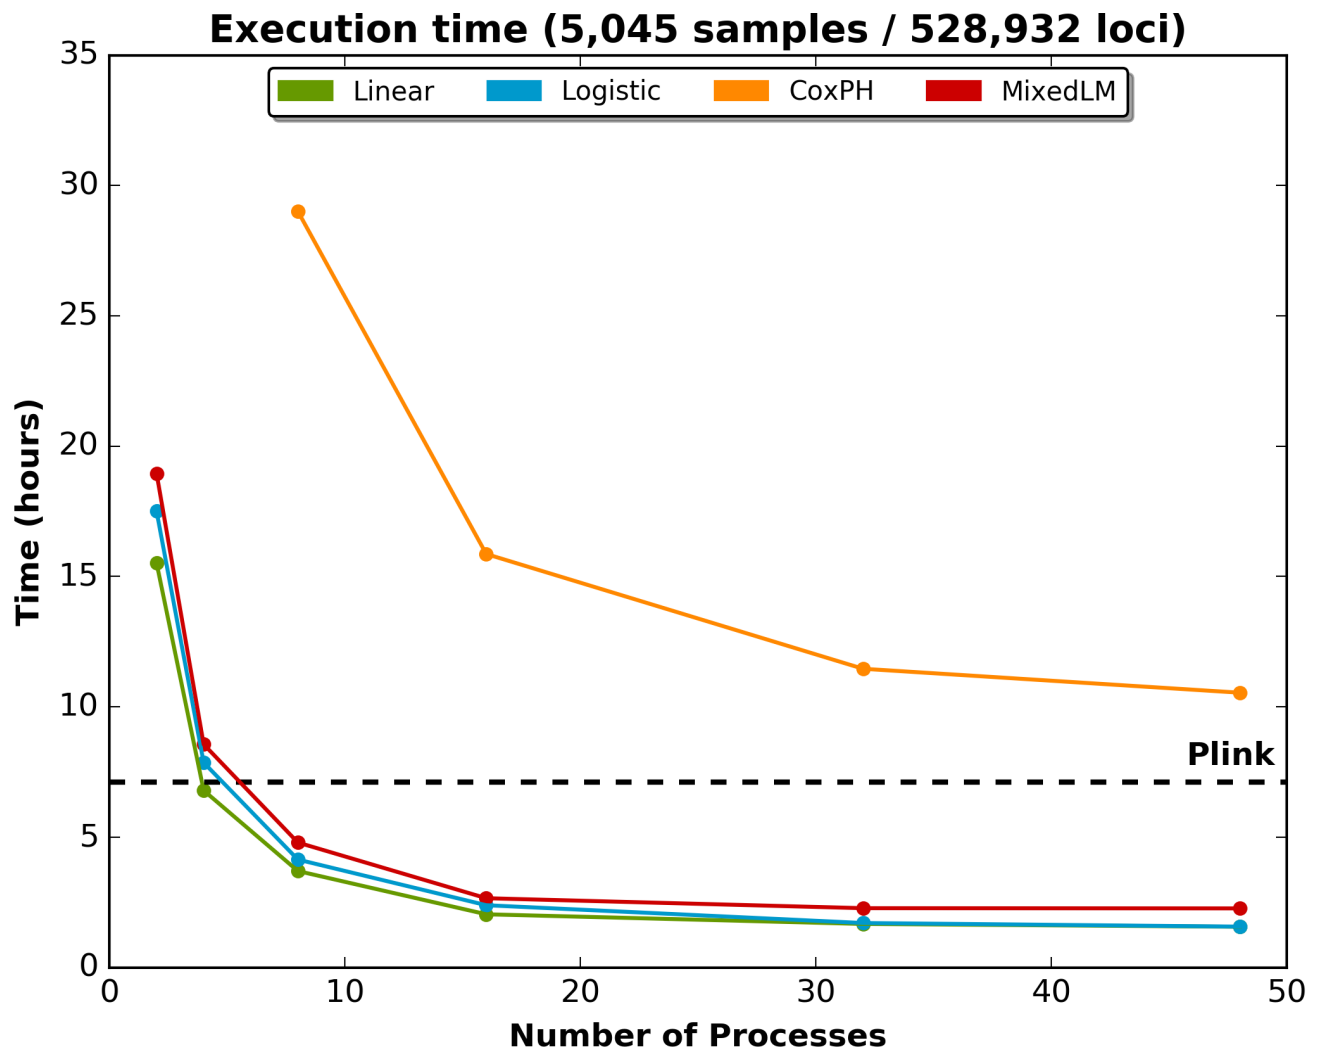

**Figure S1: Execution time for typical imputation analysis.** Imputation was performed on chromosome 2 for 5,045 samples using *genipe*. A total of 1,170,797 loci were imputed, where 961,019 (82.1%) had sufficient imputation quality. Statistics were computed on loci with minor allele frequency higher than 1% (a total of 528,932 loci). The black dashed line is the execution time for Plink (logistic regression on a single process). The four models (linear, logistic, Cox’s proportional hazard and mixed linear model [ten repeated measurements]) were executed using 2, 4, 8, 16, 32 and 48 processes. Cox’s proportional hazard analysis was not performed on 2 and 4 processes to save time. An optimization was made so that the linear mixed model could perform as well as a linear or logistic regression. This optimization is the two-step linear mixed model [1]. If the estimated  $p$ -value is lower than a user-specified threshold, the standard linear mixed model is used to gather all the required statistics. Figure S2 and S3 show the correlation between the estimated  $p$ -value and the real one.

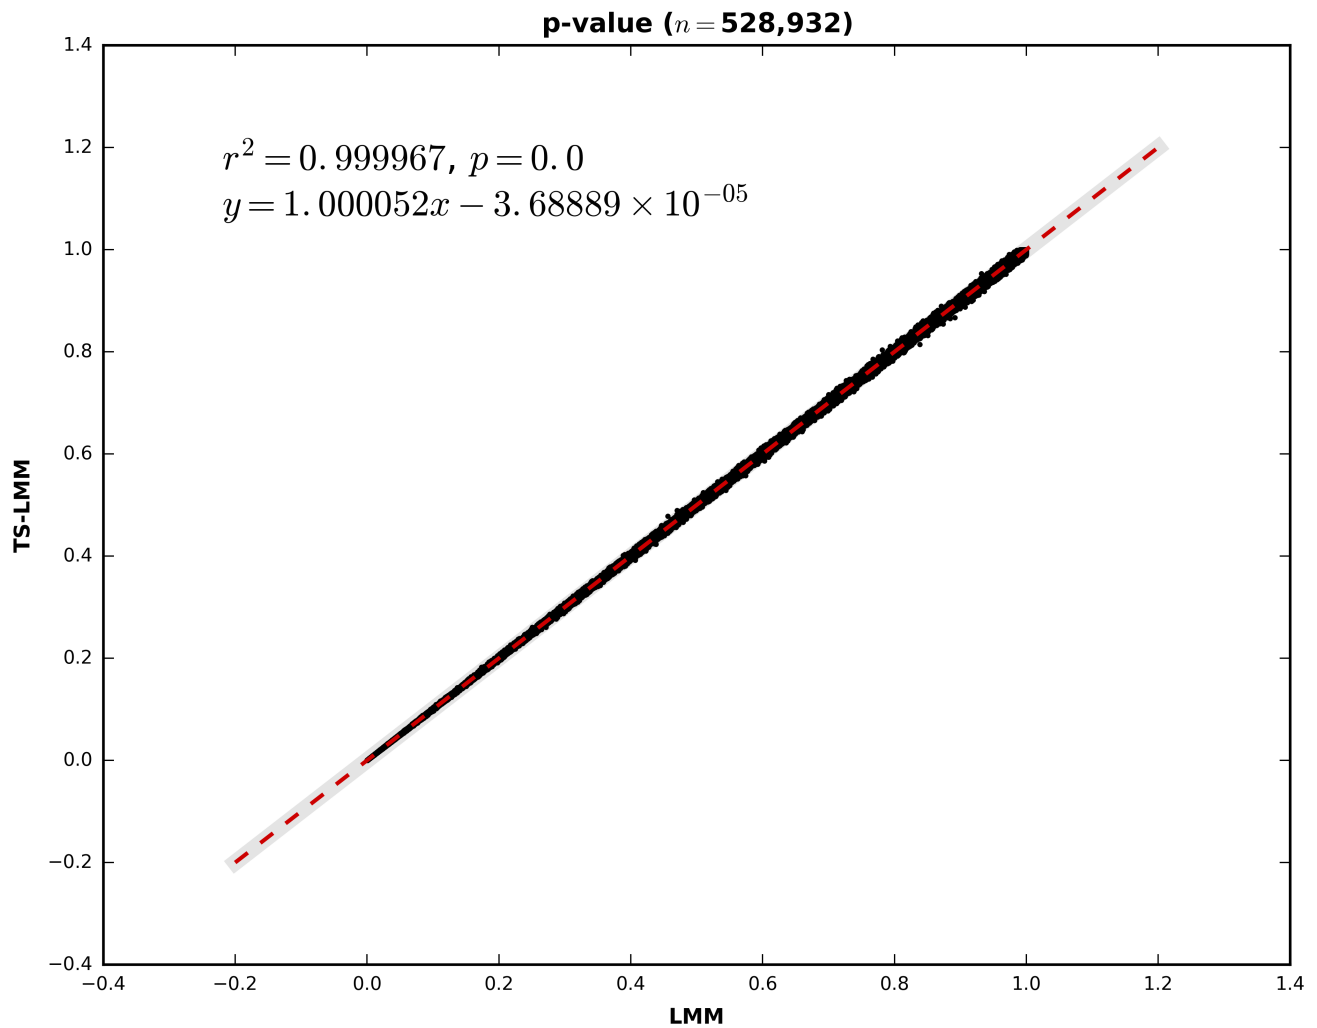

**Figure S2: Correlation of the  $p$ -values between the standard and the two-step linear mixed models.** The standard and two-step linear mixed models were used on the same dataset (*i.e.* 5,045 samples (ten repeated measurements) imputed on chromosome 2, where 528,932 loci had sufficient imputation quality and a minor allele frequency higher than 1%). Each dot represents a  $p$ -value. The light-gray bar is the identity line ( $y = x$ ). The red dashed line is the estimated slope of the linear regression (equation at the top-left). The Pearson correlation ( $r^2$ ) was 0.999967.

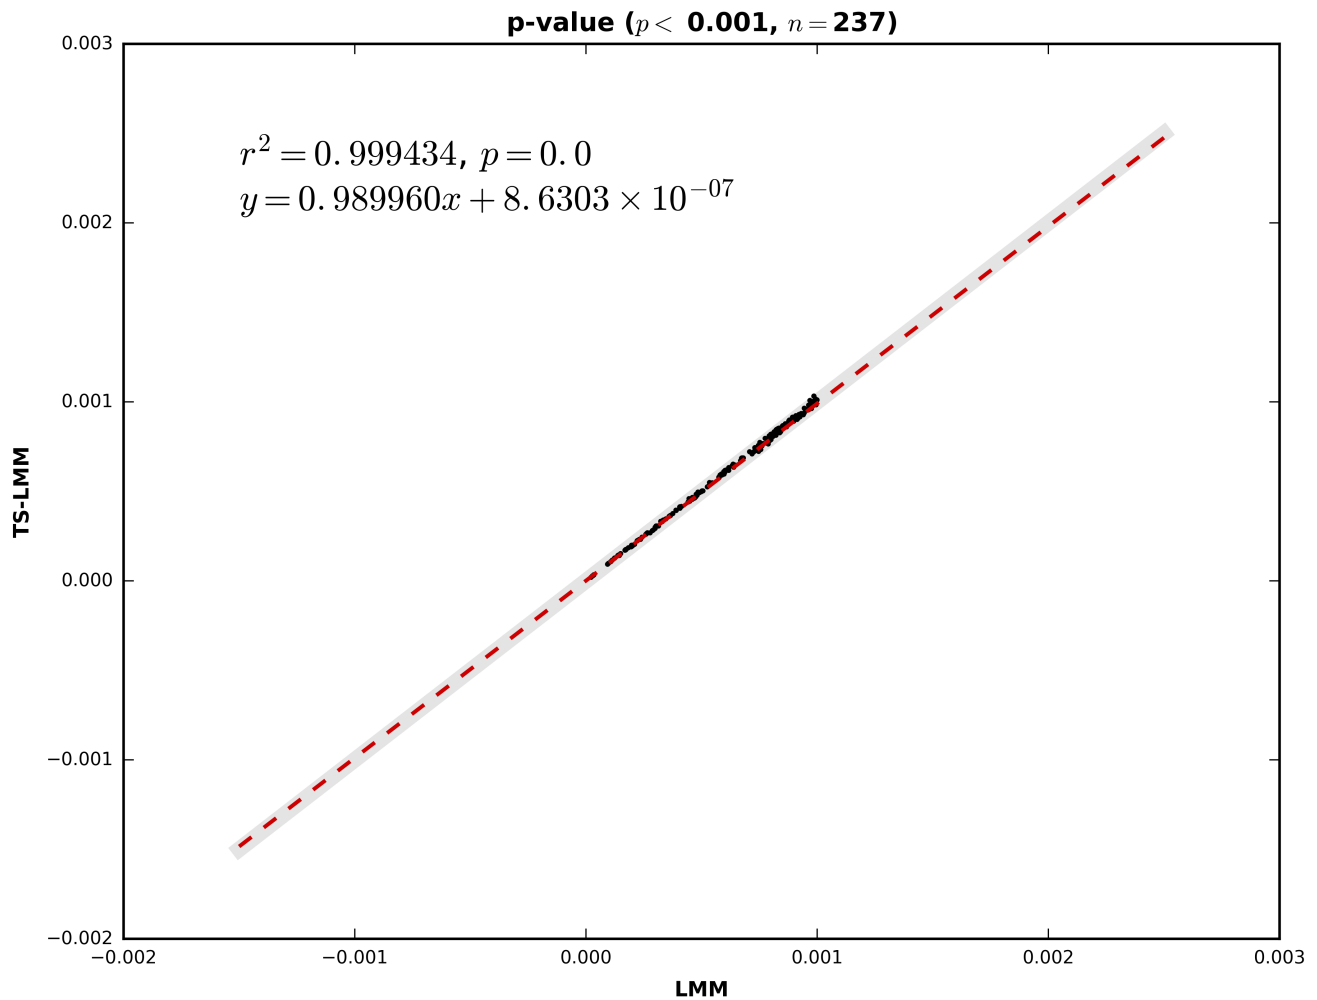

**Figure S3: Correlation of the  $p$ -values ( $< 1 \times 10^{-3}$ ) between the standard and the two-step linear mixed models.** The standard and two-step linear mixed models were used on the same dataset (*i.e.* 5,045 samples (ten repeated measurements) imputed on chromosome 2, where 528,932 loci had sufficient imputation quality and a minor allele frequency higher than 1%). A total of 237 loci had a  $p$ -value lower than  $1 \times 10^{-3}$ . Each dot represents a  $p$ -value. The light-gray bar is the identity line ( $y = x$ ). The red dashed line is the estimated slope of the linear regression (equation at the top-left). The Pearson correlation ( $r^2$ ) was 0.999434.

## References

- [1] Sikorska K, Montazeri NM, Uitterlinden A, Rivadeneira F, Eilers PH, Lesaffre E: **GWAS with longitudinal phenotypes: performance of approximate procedures.** *European Journal of Human Genetics* 2015, **23**(10):1384–1391.
